# Supplementary material
Source: publisher site journal article supplement (https://www.dovepress.com/article/574169)
Supplement: Supplementary file 1 [file 574169%20Supplementary%20Material.docx]

**Supplemental Materials**

**Supplemental Tables**

**Table S1.** Detailed LC–MS/MS Parameters for Flumatinib and OH-Midazolam in the CYP3A4 Stability Assay

| LC conditions (Shimadzu LC-20ADXR) | Mobile phase A | 10 mM ammonium acetate in water | | |
| --- | --- | --- | --- | --- |
| Mobile phase B | Methanol | | |
| Flow rate | 0.6000 mL/min | | |
| Column | Welch Ultimate AQ-C18, 2.1*50 mm，5 μm | | |
| Column temperature | 40℃ | | |
| Gradient elution | Time (min) | Mobile Phase B (%) | |
| 0.01 | 15 | |
| 0.50 | 15 | |
| 1.70 | 95 | |
| 2.70 | 95 | |
| 2.71 | 15 | |
| 3.50 | Stop | |
| MS conditions (AB Sciex API 5000) | Compound | Q1/Q3 (Da) | DP (V) | CE (eV) |
| Flumatinib | 563.2/463.2 | 239 | 40 |
| OH-Midazolam | 342.1/203.0 | 160 | 40 |
| Carbamazepine | 237.3/194.2 | 120 | 26 |
| Scan Type | | MRM | |
| Ionization mode | | Positive | |
| Ion Source | | ESI | |

**Table S2.** LC–MS/MS Analytical Conditions for N-Desethyl amodiaquine in the CYP2C8 Stability Assay

| LC Conditions (Model: LC-30AD) | Mobile phase A | 0.1% formic acid in water | | |
| --- | --- | --- | --- | --- |
| Mobile phase B | 0.1% formic acid in 5% water and 95% methanol | | |
| Flow rate | 0.6000 mL/min | | |
| Column | Welch Ultimate AQ-C18, 2.1*50 mm，5 μm | | |
| Column temperature | 40℃ | | |
| Gradient elution | Time (min) | Mobile Phase B (%) | |
| 0.01 | 5 | |
| 1.80 | 95 | |
| 2.50 | 95 | |
| 2.51 | 5 | |
| 3.50 | Stop | |
| MS Conditions (Model: 4000 QTRAP) | Compound | Q1/Q3 (Da) | DP (V) | CE (eV) |
| N-Desethyl amodiaquine | 328.3/283.1 | 70 | 25 |
| Scan Type | | MRM | |
| Ionization mode | | Positive | |
| Ion Source | | ESI | |

**Table S3.** LC–MS/MS Analytical Conditions for Quantification of Analytes in the Caco-2 Permeability Assay

| LC conditions (Shimadzu LC-20ADXR) | Mobile phase A | 0.1% formic acid in water | | |
| --- | --- | --- | --- | --- |
| Mobile phase B | Acetonitrile | | |
| Flow rate | 0.6000 mL/min | | |
| Column | Welch Ultimate ® AQ-C18, 2.1*50 mm，5 μm | | |
| Column temperature | 40℃ | | |
| Gradient elution | Time (min) | Mobile Phase B (%) | |
| 0.01 | 5 | |
| 0.30 | 5 | |
| 1.00 | 98 | |
| 2.00 | 98 | |
| 2.01 | 5 | |
| 3.00 | Stop | |
| MS conditions (AB Sciex API 5000) | Compound | Q1/Q3(Da) | DP (V) | CE (eV) |
| Flumatinib | 561.4/303.3 | -240 | -52 |
| Glibenclamide | 492.4/170.2 | -100 | -40 |
| Scan Type | MRM | | |
| Ionization mode | Negative | | |
| Ion Source | ESI | | |

**Table S4.** LC–MS/MS analytical conditions for determination of 6β-hydroxytestosterone in the time-dependent inhibition assay using human liver microsomes

| LC conditions (Shimadzu LC system) | Mobile phase A | 0.1% formic acid in water | | |
| --- | --- | --- | --- | --- |
| Mobile phase B | 0.1% formic acid in acetonitrile | | |
| Flow rate | 0.600 mL/min | | |
| Column | ACQUITY UPLC HSS T3, 1.8 μm, 50 mm × 2.10 mm | | |
| Column temperature | 40℃ | | |
| Gradient elution | Time (min) | Mobile Phase B (%) | |
| Initial | 20 | |
| 2.20 | 55 | |
| 2.50 | 95 | |
| 2.80 | 95 | |
| 2.81 | 20 | |
| 3.50 | 20 | |
| MS conditions (AB Sciex Triple Quad 6500+) | Compound | Q1/Q3 (m/z) | DP (V) | CE (eV) |
| 6β-Hydroxy testosterone | 305.4/269.3 | 90 | 22 |
| Glibenclamide (IS) | 271.1/172.0 | 70 | 18 |
| Scan Type | MRM | | |
| Ionization mode | Negative | | |
| Ion Source | ESI | | |

**Table S5.** Detailed Input Parameters for the Physiologically Based Pharmacokinetic Model of Flumatinib, Including Absorption, Distribution, Metabolism, and Elimination Properties

| **Parameters** | **Value** | **Source** |
| --- | --- | --- |
| **Physicochemical parameters** | | |
| Molecular weight (g/mol) | 562.6 | Drug bank |
| log P | 4.132 | Predicted by ADMET PredictorTM |
| Solubility at pH 9.03 (mg/mL) | 0.08753 | Predicted by ADMET PredictorTM |
| Compound type | Diprotic Base |  |
| pKa | 10.72 | Predicted by ADMET Predictor |
| 7.92 |
| Rbp | 1.46 | *in vitro* experiments |
| fu,p (%) | 4.04 | Lipid adjusted by GastroPlus® |
| **Absorption** **parameters** | ACAT Model |  |
| Caco-2 permeability (10-6 cm·s-1) | 0.15 | *in vitro* experiments |
| fu,G | 1 | Assumed |
| Formulation | Immediate Release (IR) Tablet |  |
| Dissolution model | Johnson | GastroPlus® default value |
| GI Absorption Scaling Factor (ASF) | |  |
| Stomach | 0 | Estimated to match 20% parent excreted in feces observed in Gong, et al. 20101 |
| Duodenum | 1.75 |
| Jejunum1 | 3.9 |
| Jejunum2 | 2.8 |
| Ileum1 | 7.0 |
| Ileum2 | 14.5 |
| Ileum3 | 0.12 |
| Caecum | 2.0 |
| Ascending Colon | 0.2 |
| **Distribution parameters** | Full PBPK Model |  |
| Vss (L) | 562.99 | Predicted by GastroPlus® |
| *K*P method |  | GastroPlus® default (Lukacova) |
| **Elimination parameters** | | |
| Systemic clearance, CLsys (L/h) | 12.6 | Predicted by GastroPlus® |
| CLint CYP3A4 (µL/min/pmol) | 4.31 | *in vitro* experiments |
| CLint CYP2C8 (µL/min/pmol) | 3.62 | *in vitro* experiments |
| In vivo CLint CYP3A4 (L/h) | 1336.0 | Metabolism and Transport TM |
| In vivo CLint CYP2C8 (L/h) | 330.4 | Metabolism and Transport TM |
| Km, (rCYP3A4) (μM) | 3.06 | Liu, et al.20232 |
| Vmax, CYP3A4 (PBPK Tissue) [(mg/s)/mg] | 6.75 | Optimized value |
| Vmax, CYP3A4 (Enterocytes) (mg/s) | 1.997 | Optimized value |
| Vmax, CYP3A4 (Enterocytes) Scale Factor | 6.43 | Optimized value |
| Km (in vivo) (mg/L) | 27.54 | Optimized value |
| **Interaction** | | |
| KI- CYP3A4 (µM) | 197.6 | *in vitro* experiment |
| kinact- CYP3A4(1/min) | 0.0192 | *in vitro* experiment |

**Note:** log P, partition coefficient in oil and water; pKa, acid dissociation constant; fu,p, unbound fraction in plasma; Fa, Fraction Absorbed; Vss, volume of distribution at steady-state; CLint, intrinsic clearance; KI, concentration of mechanism-based inhibitor associated with half maximal inactivation rate; *Kinact*, maximal inactivation rate constant of the enzyme; Rbp, Blood to Plasma concentration ratio.

**Table S6.** Clinical study data utilized for the development and validation of the flumatinib PBPK model

| **Clinical study** | **Population** | **Study description** | **Age range** | **Gender (Male/Female)** | **Dose regimen** | **PK data used in PBPK model** |
| --- | --- | --- | --- | --- | --- | --- |
| Bo jiang, *et al*. 20233 | CML patients | Pharmacokinetic study | 47.93±11.45 | 11/4 | 400 mg single dose (fasted) | Development |
| 47.93±11.45 | 11/4 | 400 mg daily days 4-11 (fasted) | Development |
| 46.36±12.63 | 9/5 | 600 mg single dose (fasted) | Development |
| 46.36±12.63 | 9/5 | 600 mg daily days 4-11 (fasted) | Development |
| Yun Kuang, *et al*. 20204 | Healthy Chinese subjects | Food effect study | 23.5±4.72 | 6/6 | 400 mg single dose (fasted) | Validation |
| Gong, et al. 20101 | CML patients | Pharmacokinetic study | 18-65 | n=3 | 80 mg single dose; 80 mg daily days 1-28 (fasted) | Validation |
| n=6 | 140 mg single dose; 140 mg daily days 1-28 (fasted) | Validation |
| n=3 | 240 mg single dose; 240 mg daily days 1-28 (fasted) | Validation |
| n=3 | 360 mg single dose; 360 mg daily days 1-28 (fasted) | Validation |

**Note:** CML, chronic myeloid leukemia

**Table S7.** Summary of the Trial Design Framework for Flumatinib Drug–Drug Interaction Simulations

| **Regimen**  **of flumatinib** | | **Co-administered drug** | **Dosing regimen of**  **co-administered drug** | | **Possible pathway of DDI** |
| --- | --- | --- | --- | --- | --- |
| Victim drug | 400 mg single dose on day 8 | Itraconazole | 200mg/qd | Day 1-10 | CYP3A4 Inhibition |
| Fluconazole | 400mg/qd | Day 1-10 |
| N-demethyl Diltiazem | 100mg/qd | Day 1-10 |
| Ketoconazole | 400mg/qd | Day1-10 |
| 400 mg single dose on day 8 | Rifampicin | 600mg/qd | Day 1-10 | CYP3A4 Induction |
| Efavirenz | 400mg/qd | Day 1-10 |
| Perpetrator drug | 400 mg qd  Days 1-10 | Midazolam | 5mg SD | Day 8 | CYP3A4 Substrates |
| Alfentanil | 1.065mg SD | Day 8 |
| Triazolam | 0.5mg SD | Day 8 |

**Note:** qd: once daily drug administration; SD: single dose

**Table S8.** Time-Dependent Residual Concentrations of Flumatinib in Recombinant CYP3A4 and CYP2C8 Metabolic Stability Assays

| Recombinase | Time (min) | Sample name | Peak area ratio | Mean | Residual concentration rate (%) | Ln (Residual concentration rate) |
| --- | --- | --- | --- | --- | --- | --- |
| `rCYP3A4 | 0 | Flumatinib-3A4-0min-1 | 0.848 | 0.848 | 100 | 4.61 |
| Flumatinib-3A4-0min-2 | 0.848 |
| 5 | Flumatinib-3A4-5min-1 | 0.135 | 0.132 | 15.6 | 2.75 |
| Flumatinib-3A4-5min-2 | 0.129 |
| 15 | Flumatinib-3A4-15min-1 | 0.0146 | 0.124 | 1.46 | 0.38 |
| Flumatinib-3A4-15min-2 | 0.0102 |
| 30 | Flumatinib-3A4-30min-1 | 0.00113 | 0.00108 | 0.127 | -2.06 |
| Flumatinib-3A4-30min-2 | 0.00103 |
| 60 | Flumatinib-3A4-30min-1 | 0.000335 | 0.000325 | 0.0383 | -3.26 |
| Flumatinib-3A4-30min-2 | 0.000315 |
| `rCYP2C8 | 0 | Flumatinib-2C8-0min-1 | 0.436 | 0.442 | 100 | 4.61 |
| Flumatinib-2C8-0min-2 | 0.447 |
| 5 | Flumatinib-2C8-5min-1 | 0.100 | 0.102 | 23 | 3.14 |
| Flumatinib-2C8-5min-2 | 0.103 |
| 15 | Flumatinib-2C8-15min-1 | 0.00971 | 0.009 | 2.04 | 0.712 |
| Flumatinib-2C8-15min-2 | 0.00829 |
| 30 | Flumatinib-2C8-30min-1 | 0.00176 | 0.0018 | 0.408 | -0.897 |
| Flumatinib-2C8-30min-2 | 0.00184 |
| 60 | Flumatinib-2C8-30min-1 | 0.00127 | 0.00105 | 0.237 | -1.44 |
| Flumatinib-2C8-30min-2 | 0.000821 |

**Table S9.** In Vitro Intrinsic Clearance (CLint) of Flumatinib in Recombinant Enzymes

| **Compound** | **Recombinase** | **Residue (%)** | **R2** | **T1/2** | **In vitro CLint**  **(mL/min/pmol)** |
| --- | --- | --- | --- | --- | --- |
| **Flumatinib** | rCYP3A4 | 0.0383 | 0.9736 | 3.2 | 0.00431 |
| rCYP3A8 | 0.237 | 0.9509 | 3.83 | 0.00362 |

**Table S10.** Representative analytical output and calculated blood-to-plasma (B/P) ratio parameters for flumatinib

| **Sample Name** | **Analyte Peak Area (counts)** | **IS Peak Area (counts)** | **Area Ratio** | **Average** | **B/P Ratio** | **Cr/Cp** | **Recovery  (%)** |
| --- | --- | --- | --- | --- | --- | --- | --- |
| Flumatinib-Human-Blood-1uM-1h-1 | 30186 | 435633 | 0.0693 | 0.0689 | 1.46 | 1.92 | 94.3 |
| Flumatinib-Human-Blood-1uM-1h-2 | 29773 | 434568 | 0.0685 |
| Flumatinib-Human-Blood-1uM-0h-1 | 29785 | 423067 | 0.0704 | 0.0731 |
| Flumatinib-Human-Blood-1uM-0h-2 | 33194 | 438417 | 0.0757 |
| Flumatinib-Human-Plasma-1uM-1h-1 | 56261 | 462643 | 0.122 | 0.124 |
| Flumatinib-Human-Plasma-1uM-1h-2 | 58003 | 461901 | 0.126 |
| STD-Flumatinib-Human-Plasma-1uM-1 | 86241 | 434893 | 0.198 | 0.192 |
| STD-Flumatinib-Human-Plasma-1uM-2 | 85679 | 460970 | 0.186 |

**Table S11.** Summary of Caco-2 Permeability Experiment Data for Flumatinib

| **Compound** | **Average Apparent Permeability (Papp)（×10-6 cm/s）** | | **Efflux Ratio** | **Total Recovery (%)** | | **Categories** | |
| --- | --- | --- | --- | --- | --- | --- | --- |
| A-B | B- A | A-B | B-A | Permeability | Substrate of Efflux Transporter (Yes/NA) |
| Minoxidil | 3.72 | ND | ND | 72.7 | ND | High | NA |
| Atenolol | 0.218 | ND | ND | 96.4 | ND | Median | NA |
| Digoxin | 0.0518 | 8.76 | 169 | 81.8 | 71.7 | Low | Yes |
| Flumatinib | 0.150 | 18.7 | 124 | 124 | 92.4 | Low | Yes |

**Note:** A→B, apical-to-basolateral transport; B→A, basolateral-to-apical transport; IS, internal standard

**Table S12.** *KI*and *kinact*Parameters of Flumatinib Determined in Human Liver Microsomes

| **Compound** | **CYP Enzyme Subtype** | **Probe Substrate** | **Method** | ***Kinact***  **(min-1)** | ***KI***  **(****µM)** | **kinact/KI**  **(mL/min/µmol)** | ***R2*** |
| --- | --- | --- | --- | --- | --- | --- | --- |
| Flumatinib（Mesylate） | 3A4-T | Testosterone | Michaelis-Menten Equation | 0.0192 | 197.6 | 0.097 | 0.9979 |
| Lineweaver-Burk | 0.0187 | 183.6 | 0.102 | 0.9987 |

**Supplemental Figures**


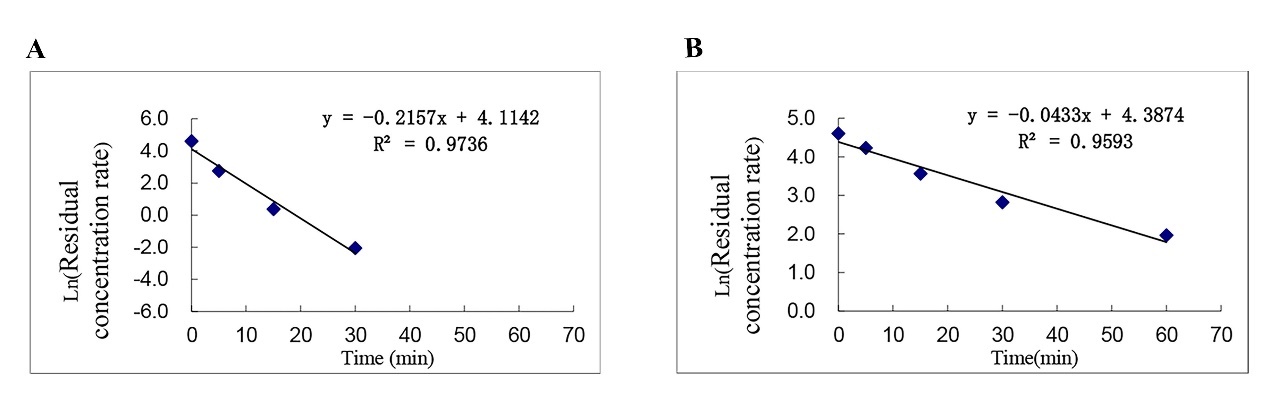


**Figure S1.** Metabolic Clearance-Incubation Time Curves of Flumatinib with Recombinant Enzymes CYP3A4 (A) and CYP2C8 (B)


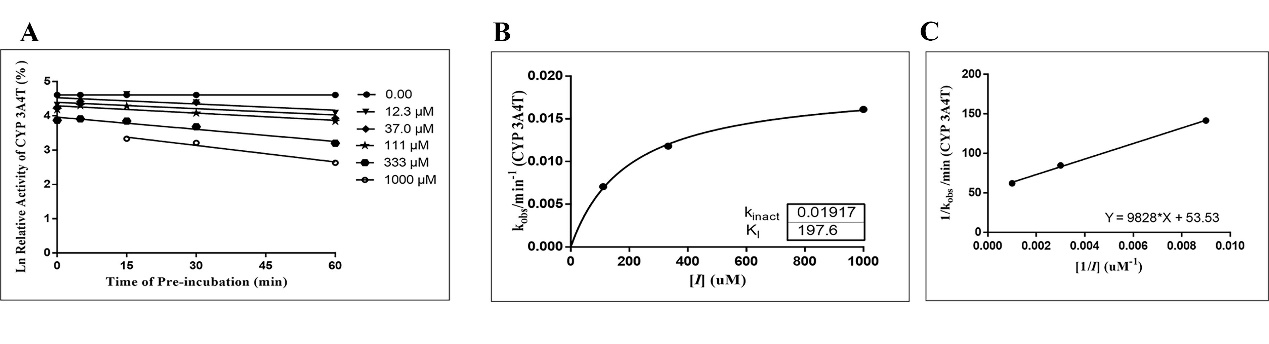


**Figure S2.** Inactivation plot (natural logarithm of the corrected % remaining activity versus pre-incubation time) for Flumatinib using testosterone as the substrate (A); Michaelis-Menten Nonlinear Fitting Plot (B); Lineweaver-Burk Linear Fitting Plot (Double-Reciprocal Plot) (C)

**References:**

1. Gong A. *Pharmacokinetics and metabolism of flumatinib in patients with chronic myeloid leukemia.* Graduate University of Chinese Academy of Sciences; 2010.

2. Liu YN, Xu X, Nie J, et al. Studies on the inhibitory effect of isavuconazole on flumatinib metabolism in vitro and in vivo. *Front Pharmacol*. 2023;14:1168852. doi:10.3389/fphar.2023.1168852

3. Jiang B, Qi J, Sun M, et al. Pharmacokinetics of single- and multiple-dose flumatinib in patients with chronic phase chronic myeloid leukemia. *Front Oncol*. 2023;13:1101738. doi:10.3389/fonc.2023.1101738

4. Kuang Y, Song HL, Yang GP, et al. Effect of high-fat diet on the pharmacokinetics and safety of flumatinib in healthy Chinese subjects. *Cancer Chemother Pharmacol*. Sep 2020;86(3):339-346. doi:10.1007/s00280-020-04117-w
